1 ***Cauliflower mosaic virus* disease spectrum uncovers novel susceptibility factor *NCED9* in**  
2 ***Arabidopsis thaliana***

3 Gesa Hoffmann<sup>a,b</sup>, Aayushi Shukla<sup>a,b</sup>, Silvia López-González<sup>a,b</sup> & Anders Hafrén<sup>a,b</sup>

4 <sup>a</sup> Department of Plant Biology, Uppsala BioCenter, Swedish University of Agricultural Sciences, 75007  
5 Uppsala, Sweden

6 <sup>b</sup> Linnean Center for Plant Biology, 75007 Uppsala, Sweden

7

8 *Running title:* GWAS on CaMV infected *Arabidopsis*

9 # of Figures: 7

10 # of supplementary Figures: 4

11 # of Tables: 0

12 # of supplementary Tables: 9

13

14 **Abstract**

15 Viruses are intimately linked with their hosts and especially dependent on gene-for-gene  
16 interactions to establish successful infections. The genotype of their hosts thus has a strong  
17 influence on the outcome virus disease. On the host side, defence mechanisms like tolerance and  
18 resistance can occur within the same species leading to differing virus accumulation in relation to  
19 symptomology and plant fitness. The identification of novel resistance genes and susceptibility  
20 factors against viruses is an important part in understanding viral pathogenesis and securing food  
21 production. The model plant *Arabidopsis thaliana* displays a wide symptom spectrum in response  
22 to RNA virus infections and unbiased genome-wide association studies have proven a powerful  
23 tool to identify novel disease-genes. In this study we infected natural accessions of *Arabidopsis*  
24 *thaliana* with the pararetrovirus *Cauliflower mosaic virus* to study the phenotypic variations  
25 between accessions and their correlation with virus accumulation. Through genome-wide  
26 association mapping of viral accumulation differences, we identified several susceptibility factors  
27 for CaMV, the strongest of which was the abscisic acid synthesis gene *NCED9*. Further  
28 experiments confirmed the importance of abscisic acid homeostasis and its disruption for CaMV  
29 disease.

30

## 31 INTRODUCTION

32 Plant viruses are ubiquitous in wild and cultivated habitats with profound impacts on host  
33 populations (Prendeville *et al.*, 2012). As obligate intracellular parasites, they are fully dependent  
34 on host-compatibility to complete their replication cycle, and genetic variation within both the  
35 plant and viral species can have major effects on the disease outcome (Butkovic *et al.*, 2022;  
36 Cecchini *et al.*, 1998). Of particular interest is the continuum of two mechanisms, tolerance and  
37 resistance, plants employ against invading pathogens. Host resistance leads to reduced or absent  
38 viral replication and functions commonly through targeted degradation of viral components and  
39 incompatibility with the host machinery (Soosaar *et al.*, 2005). Tolerance is fundamentally  
40 different from resistance and defined as a mitigation strategy aimed at minimizing cost of infection  
41 on plant growth, yield and reproduction, rather than investing resources to fight the infection by  
42 suppressing pathogen multiplication (Pagán & García-Arenal, 2020; Cooper & Jones, 1983).  
43 Tolerance mechanisms can result in high levels of virus accumulation in visible healthy plants, a  
44 powerful example being the recently reported *Arabidopsis latent virus 1* that has spread through  
45 natural and laboratory populations of *Arabidopsis thaliana* (*Arabidopsis*) without detection  
46 (Verhoeven *et al.*, 2022). While agricultural research has historically focused on resistance to  
47 battle virus disease, evidence is accumulating that tolerance plays a pivotal role for many plant-  
48 virus interactions, especially in natural ecosystems, where most plants are infected by at least one  
49 virus at any given time but still appear healthy (Paudel & Sanfaçon, 2018; Roossinck, 2013).  
50 Identifying the underlying genetics of the tolerance-resistance spectrum is a difficult task, with  
51 genome-wide association studies (GWAS) emerging as a potential tool to find novel genes and  
52 pathways implicated in plant-pathogen interactions (reviewed in (Bartoli & Roux, 2017)).  
53 Compared to other pathogen classes, GWAS on plant-virus interactions are scarce and most have  
54 focused on crop and vegetable species (reviewed in (Monnot *et al.*, 2021)). Even though, thanks  
55 to the extensive 1001 genomes project, *Arabidopsis* is a superb resource for GWA studies, with  
56 over 1000 sequenced naturally inbred accessions collected worldwide (Consortium, 2016). To our  
57 knowledge six recent GWA studies have been conducted on RNA virus infections in *Arabidopsis*  
58 (Butkovic *et al.*, 2022; Liu *et al.*, 2022; Butković *et al.*, 2021; Montes *et al.*, 2021; Rubio *et al.*,  
59 2019; Pagny *et al.*, 2012) and successfully identified genetic loci impacting viral infections.

60 In addition to discovering new disease and resistance genes for possible application in crop  
61 breeding and protection strategies, natural genetic variation and associated phenotypic variation in  
62 virus accumulation and symptomology can suggest fundamental perspectives on plant-virus  
63 interactions. Only one of the six virus/*Arabidopsis* GWA studies determined both symptomology  
64 and virus accumulation and found a weak positive correlation between the traits (Rubio *et al.*,  
65 2019). Yet, plant viruses generally do not show an correlation between symptomology and  
66 accumulation across *Arabidopsis* accessions as observed e.g. for CaMV and other viruses in more  
67 narrow experimental setups (Bergès *et al.*, 2021; Shukla *et al.*, 2018; Pagán *et al.*, 2007; Cecchini  
68 *et al.*, 1998), suggesting tolerance as a ubiquitous process in plant viral diseases.

69 In this study we examined the disease spectrum of the double-stranded DNA Caulimovirus  
70 *Cauliflower mosaic virus* (CaMV; family *Caulimoviridae*) in 100 natural accessions of  
71 *Arabidopsis thaliana*. CaMV host range is limited to members of the Brassicaceae, including  
72 mustard, broccoli and cabbage and infects natural populations of *Arabidopsis* (Pagán *et al.*, 2010).  
73 CaMV challenges its host with the establishment of large cytoplasmic viral replication centers, as  
74 well as an uncommon increase of global translation, due to the viral translational transactivator  
75 protein P6 (Hoffmann *et al.*, 2022; Schoelz & Leisner, 2017). The unique properties of CaMV  
76 implicate the existence of a network of host factors possibly influencing CaMV disease.  
77 Interestingly, CaMV infection was shown to cause a range of disease severity in response to water  
78 deficit in natural accessions of *Arabidopsis* (Bergès *et al.*, 2020), altogether making CaMV a  
79 suitable virus for a GWA study in *Arabidopsis*.

80 Here, we show that CaMV disease differs greatly in *Arabidopsis* accessions, dependent on the host  
81 genotype and use this variety to map underlying host genes. We find that the abscisic acid (ABA)  
82 synthesis gene 9-Cis-Epoxycarotenoid Dioxygenase 9 (*NCED9*) is an important susceptibility  
83 factor for CaMV, as infection is almost completely abolished in the *nced9* mutant line.  
84 Additionally, ABA, an important plant hormone in abiotic and biotic stress response (Verma *et*  
85 *al.*, 2016; Ton *et al.*, 2009), is targeted during CaMV infection and miss-regulation of ABA  
86 homeostasis increases CaMV levels.

87

88

## 89 **Material & Methods**

### 90 **Plant Material and Growth Conditions**

91 100 accessions of *Arabidopsis thaliana* (supplementary Table S1) were provided by the group of  
92 Magnus Nordborg (Gregor Mendel Institute, Vienna). The T-DNA lines used in this study were  
93 ordered from the NASC stock center and all generated in Columbia (Col-0) background, which  
94 was taken as control for all mutant experiments (supplementary Table S2). Seeds were plated on  
95 damp soil and stored at 4C in the dark for one week to ensure germination synchronization.  
96 Seedlings were separated at 6 plants per pot 8 days after transfer to a walk-in chamber in short day  
97 conditions (120 mE, 10h light / 14h dark cycle) at 22°C and 65% relative humidity. Pots were  
98 randomized within each tray and tray position within the chamber was switched randomly once a  
99 week. Infections were carried out 18 days after transfer to growth conditions. Infections of natural  
100 accessions were repeated twice in timely separated experiments. T-DNA lines were infected at  
101 least three times in timely separated experiments. *Arabidopsis* plants were grown in walk-in  
102 chambers in standard long day conditions (16h light / 8h dark cycle) at 22°C and 65% relative  
103 humidity for propagation. For long day infection experiments, seeds were plated on damp soil and  
104 stored at 4C in the dark for one week to ensure germination synchronization. Seedlings were  
105 separated at 4 plants per pot 6 days after transfer to a walk-in chamber and infections carried out  
106 15 days after transfer to growth condition.

### 107 **Virus Inoculation and Symptom Scoring**

108 *Arabidopsis* plants were infected with CaMV 18 days after germination. The first true leaves were  
109 infiltrated with *Agrobacterium tumefaciens* strain C58C1 carrying CaMV strain CM1841. Plants  
110 were scored for symptoms and photographed at 21 dpi. Symptom categories (0-5) correspond to  
111 no visible symptoms (0), mild vein clearing (1), leaf bending (2), rosette distortion (3), rosette  
112 shrinking (4) and early senescence with necrotic lesions (5) and were determined for each  
113 accession. Failed infections were removed from pots before taking above ground fresh weights  
114 for individual plants. All infected plants (n=3-6) of one accession were pooled for titer  
115 measurements and ground to fine powder in liquid nitrogen. Infections with the RNA viruses were  
116 performed using clones described in (Ling *et al.*, 2013) for *Turnip rosette virus* (TRoV – family  
117 *Solemoviridae*) and (Garcia-Ruiz *et al.*, 2010) for and Turnip mosaic virus (TuMV – family  
118 *Potyviridae*).

## 119 **Virus Quantification and gene expression analysis**

120 For CaMV DNA quantification, 100mg pulverized frozen leaf material was resuspended in 300  $\mu$ l  
121 100mM Tris buffer (pH 7.5), supplemented with 2% SDS and treated with Proteinase K. Total  
122 DNA was precipitated with isopropanol 1:1 (v:v). RNA extraction from rosette tissue was  
123 performed with a Qiagen RNeasy kit and on-column Dnase I digestion according to the  
124 manufacturer's protocol. About 500 ng of total RNA was used for first-strand cDNA synthesis  
125 with a Maxima First Strand cDNA Synthesis Kit (Thermo Fisher Scientific Waltham, MA, USA)].  
126 qRT-PCR analysis of DNA and cDNA was performed with Maxima SYBR Green/Fluorescein  
127 qRT-PCR Master Mix (Thermo Fisher Scientific) using the CFX Connect Real-Time PCR  
128 detection system (Bio-Rad, Hercules, CA, USA) with specific primers (supplementary Table S9).  
129 Viral DNA was normalized to genomic *ACTIN7* (AT5G09810) for all accessions and *18S*  
130 ribosomal DNA for T-DNA lines. Viral transcripts and ABA responsive transcripts were  
131 normalized to *PP2a* (*AT1G69960*).

## 132 **Genome-wide association mapping**

133 Genome-wide association mapping was performed on 100 accessions using an online portal  
134 provided by Gregor Mendel Institute, Austria (<https://gwas.gmi.oeaw.ac.at>) (Seren *et al.*, 2012)  
135 against the Imputed Fullsequence Dataset (Long *et al.*, 2013; Cao *et al.*, 2011; Gan *et al.*, 2011)  
136 with an accelerated mixed model to correct for population structure (Seren *et al.*, 2012). Analysis  
137 was performed with untransformed data. For this publication, SNPs were considered when they  
138 withstood a 5% false discovery rate by Benjamini-Hochberg-Yekutieli thresholding (Benjamini  
139 & Hochberg, 1995) and a minor-allele count of  $\geq 5$ . 15 T-DNA lines were chosen for the highest  
140 scoring SNPs that fell into gene bodies, caused a miss-sense mutations and had available T-DNA  
141 insertions in the NASC stock centre.

## 142 **Chemical Treatments**

143 For chemical treatments, abscisic acid (Sigma-Aldrich, A1049) and Nordihydroguaiaretic acid  
144 (Merck Chemicals and Life Science, 74540) were prepared in 99% EtOH for stock solutions. 17-  
145 day-old seedlings were sprayed with dilutions 24h before infection. The treatment was repeated  
146 once a week at the same time until harvest. The last application was performed 24h before harvest.

147

148

## 149 **Broad-sense heritability calculation**

150 The estimation of broad-sense heritability ( $h^2_b$ ) was calculated as the percentage of the total  
151 variance accounted by genetic (accession) differences ( $h^2_b = \sigma^2_G / \sigma^2_P$ , where  $\sigma^2_G$  is the genetic  
152 variance component of  $\sigma^2_P$  total phenotypic variance).  $\sigma^2_P$  and  $\sigma^2_G$  were derived by variance  
153 components analysis using separated univariate analyses (Shukla *et al.*, 2018).

## 154 **Transcriptome analysis**

155 Transcriptome data were generated by Chesnais et al. 2022. For the re-analysis of the bulk RNA-  
156 seq data, raw data was downloaded from BioProject number PRJEB49403 from the European  
157 Nucleotide Archive (<https://www.ebi.ac.uk/ena/browser/view/PRJEB49403>). Analysis was done  
158 on three replicates of mock and CaMV infected samples. In brief, downloaded reads were trimmed  
159 and checked with TrimGalore (Version 0.5.0; <https://github.com/FelixKrueger/TrimGalore>, based  
160 on Cutadapt (Martin, 2011)) using the options `-q 20 --fastq --stringency 1 --length 32 --paired`.  
161 Afterwards reads were mapped to the TAIR10 genome using Tophat2 (Version 2.1.1; (Kim *et al.*,  
162 2013)) with the parameters `--library-type=fr-firststrand -g 1 -a 10 -i 40 -I 5000 -r 150` using a the  
163 TAIR10 reference annotations for all annotated genes. Mapped output files were sorted and  
164 indexed using samtools (Version 1.6; (Li *et al.*, 2009)). FeatureCounts from the subread package  
165 (Version 2.0.1; (Liao *et al.*, 2014)) was used with the options `-T 8 -p -t gene -O -s 2` against all  
166 genes in the TAIR10 genome to generate a counts table for subsequent analysis differentially  
167 expressed genes using the R package Deseq2 ((Love *et al.*, 2014)).

168

## 169 **Bioinformatics**

170 Plots were made with R 4.0.2, using the packages “ggplot2” (Wickham, 2016), “tidyverse”  
171 (Wickham *et al.*), “raincloudplot” (Allen *et al.*, 2019) or base functions. All statistical calculations  
172 were performed in R with base functions. Figure arrangements were finalized using  
173 AffinityDesigner 1.10. Latitude and longitude data, as well as SNP data and impact prediction  
174 were taken from the <https://1001genomes.org/> website and the POLYMORPH1001 tool  
175 (<https://tools.1001genomes.org/polymorph/index.html>) (supplementary Table S1). Gene loci and  
176 descriptors were assembled through the PANTHERDB website version 16.0 using bedtools  
177 v2.30.0 “closest” function.

178

179

## 180 RESULTS

### 181 CaMV disease severity is highly variable in Arabidopsis

182 CaMV, like Arabidopsis is distributed worldwide and infects Arabidopsis and other Brassicaceae  
183 in wild populations (Pagán *et al.*, 2010; Raybould *et al.*, 1999). In this study, we examined CaMV  
184 disease in 100 Arabidopsis accessions under controlled conditions. Accessions exhibited a broad  
185 range of symptoms that were scored at 21 days past infection (dpi). We categorized symptoms  
186 from mild vein clearing (1) and leaf bending (2) over rosette distortion (3) and rosette shrinking  
187 (4) to early senescence with necrotic lesions (5) (Figure 1A; supplementary Figure S1A). Only  
188 two accessions, PHW-3 and IP-Oja-0, did not develop any visible disease (0), while most  
189 accessions developed moderate symptoms (supplementary Table S3). 83 of the 100 tested  
190 accessions were collected in Europe (Figure 1B, supplementary Figure S1B for world map), but  
191 we could not find clustering of similar disease severities along the longitudinal or latitudinal  
192 gradient (Figure 1B) and the main Admixture groups ( $n>5$ ) in our dataset did not reveal a pattern  
193 in symptom severity (Figure 1C). Relative fresh weight after virus infection is a widely used proxy  
194 for disease severity and it was strongly correlated with the visually determined disease categories  
195 in our dataset (Figure 1D, supplementary Table S3). Importantly, virus induced fresh weight loss  
196 did not correlate with the total fresh weight of mock inoculated plants, indicating that virus disease  
197 costs in these conditions are not dependent on differences in growth capacity between individual  
198 accessions (supplementary Figure S1B). We also tested a few accessions under different light  
199 conditions to evaluate the robustness of accession-specific symptomology and found that the range  
200 of symptoms was essentially reproduced (compare Figure 1A and supplementary Figure S1C).  
201 These results reveal a large spectrum of CaMV induced symptoms in Arabidopsis that appears  
202 largely independent of the global origin of the accession when grown in controlled conditions.

203

### 204 Tolerance and resistance govern CaMV disease in Arabidopsis

205 To evaluate the relation between virus accumulation and disease symptomology, we determined  
206 viral genomic DNA levels in parallel with the symptom scoring and fresh weight analysis  
207 presented in Figure 1. CaMV DNA accumulation was measured from pools of infected plants from  
208 the two replicate experiments with good reproducibility (Figure 2A, supplementary Table S4). We  
209 detected a 28-fold difference between the highest virus DNA measurement (IP-Ven-0) and the  
210 lowest (Lerik1-4) in symptomatic plants. Interestingly, we found only a weak correlation between



211 viral titer and plant symptoms and the four highest CaMV accumulators belonged to symptom  
212 group 1,2,3 and 5, indicating that virus multiplication and virulence are largely uncoupled in the  
213 present settings (Figure 2B). Likewise, several accessions from the severe symptom categories (4  
214 and 5) accumulated low levels of virus, suggesting hypersensitivity. A equally poor, but positive  
215 correlation between symptoms and viral accumulation has been previously described for the  
216 potyvirus *Turnip Mosaic Virus* (TuMV) (Rubio *et al.*, 2019), while no correlation was found for  
217 cucumovirus *Cucumber Mosaic Virus* (CMV) (Pagán *et al.*, 2007), altogether strengthening that  
218 disease symptoms are frequently not a consequence of the amount of virus within a plant. We also  
219 could not detect differences in CaMV accumulation between the different admixture groups  
220 (Figure 2C), except a slightly higher value for relics, but the low number of accessions in this  
221 group might confound the effect. Again, the highest CaMV accumulators were scattered between  
222 the Admixture groups. These data show that many *Arabidopsis* accessions vary in their tolerance  
223 against CaMV in a manner largely uncoupled from accumulation and thus, that symptom  
224 development in individual accessions is far from a direct indicator for CaMV accumulation (Figure  
225 2D).

226 A recent study by (Liu *et al.*, 2022) examined the quantitative resistance of *Arabidopsis* against  
227 two distantly related strains of CMV. 41 (for CMV-Q) and 42 (Fny-CMV- $\Delta$ 2b) accessions were  
228 shared between their study and ours. Interestingly, while no correlation could be detected between  
229 CaMV and CMV accumulation in general, individual accessions like IP-Ven-0 accumulated high  
230 virus loads in both cases and IP-Oja-0 showed full resistance against CaMV and accumulated very  
231 low levels of CMV (supplementary Figure S2). Another study on CMV virulence in *Arabidopsis*  
232 accessions from the Iberian peninsula, also found that CMV infection in IP-Ven-0 drastically  
233 reduced seed production (-96.5%), while IP-Oja-0 seed production was only decreased by -20%  
234 after infection (Montes *et al.*, 2021). The absence of a global correlation between CaMV and CMV  
235 accumulation over the accessions suggests that individual plant-virus interactions are commonly  
236 of high importance, but single accessions might still exhibit strong resistance or susceptibility to  
237 viruses generally, possibly as a consequence of physiological traits.

238

### 239 **Genome-wide association mapping identifies novel CaMV susceptibility factors**

240 We used the GWAPP tool (Seren *et al.*, 2012) to conduct a genome-wide association (GWA)  
241 mapping of symptoms, relative fresh weight and relative CaMV accumulation in the 100



242 accessions. It is important to note that 100 accessions are a small sample size for GWA-mapping,  
243 which will result in limited resolution. Neither symptom-category, nor relative fresh weight data  
244 resulted in the identification of SNPs above the Benjamini-Hochberg threshold (supplementary  
245 Figure S3), however several regions were associated with CaMV accumulation (Figure 3A,  
246 supplementary Table S5). Broad-sense heritability for CaMV DNA accumulation was 0.58,  
247 similar to previous observations in plant-virus systems (Monnot *et al.*, 2021; Shukla *et al.*, 2018).  
248 After thresholding, we found 140 genes within a 2 kb region of significant SNPs for CaMV titer  
249 (supplementary Table S6), in accordance with the multifaceted process of viral replication. Most  
250 associated genes have no annotated function in ThaleMine (v.5.1.0-20221003). A protein class  
251 ontology search on PantherDB.org (v17.0) showed that the largest group of genes (16) by protein  
252 class ontology encodes for metabolite interconversion enzymes (PC00264), eight of which are  
253 oxidoreductases (PC00176), followed by protein modifying enzymes (8; PC00260) and  
254 transcriptional regulators (6, PC00264). Since viral replication and accumulation could be  
255 influenced by yet unknown mechanisms, we did not want to limit our downstream analysis and  
256 randomly selected 15 SNPs above the threshold located in gene bodies that caused miss-sense  
257 mutations (Coloured arrowheads in Figure 3A; supplementary Table S2) for which we analysed  
258 CaMV accumulation in Col-0 based T-DNA insertion lines.

259  
260 Intriguingly, of the 15 tested lines eight showed a significant reduction in CaMV accumulation  
261 compared to Col-0 (Figure 3B). It is noteworthy that none of the tested lines increased CaMV  
262 accumulation, suggesting that our GWA mapping mainly identified susceptibility factors. All  
263 lines developed Col-0 like symptoms at 21 dpi, except for SALK\_123975.34.85.x, which also had  
264 the most striking reduction of viral DNA (~5% Col-0). This line harbors an insertion in the only  
265 exon of AT1G78390 (Lefebvre *et al.*, 2006). AT1G78390 encodes for 9-Cis-Epoxy-carotenoid  
266 Dioxygenase 9 (NCED9), an enzyme involved in the biosynthesis of abscisic acid (ABA). The  
267 identified SNP causes a missense mutation of Valin415 to Leucin in the NCED9 coding sequence,  
268 with a predicted moderate effect (Figure 4A). This particular polymorphism only occurs in 29  
269 natural accessions, that are all but one clustered in central and northern Europe and Russia  
270 (FIGURE 4B). We expanded the virus accumulation analysis and additionally tested 5 additional  
271 lines harboring this SNP (supplementary Table S7). On average, accessions with NCED9-415L  
272 accumulated significantly more virus than NCED9-415V (Figure 4C).

273

## 274 **NCED9 is essential for robust CaMV accumulation**

275 NCED9 is best examined for its role during seed development and germination (Lefebvre *et al.*,  
276 2006; Tan *et al.*, 2003a). We found that CaMV infection induced *NCED9* expression when  
277 compared to healthy plants, albeit still to low levels (Figure 5A). We used an independent publicly  
278 available transcriptome set of Arabidopsis infected with the same CaMV strain CM184I from 21  
279 days after aphid inoculation (Chesnais *et al.*, 2022) and could also find increased levels of *NCED9*  
280 transcript in response to CaMV (Figure 5B). The *nced9* T-DNA line developed no symptoms  
281 except for a mild vein clearing phenotype in older leaves over an infection time of 44 days (Figure  
282 5C) and displayed no fresh weight loss compared to uninfected control plants when challenged  
283 with CaMV (Figure 5D). This resistance phenotype was persistent also under long-day light  
284 regimes (supplementary Figure S4A). After backcrossing *nced9* into Col-0, we used symptom  
285 development to test whether homozygous *nced9* allele is needed for CaMV resistance. Close to  
286 90% of Col-0 plants developed symptoms upon infection, while 0% of homozygous *nced9* plants  
287 did. Three independent segregating F2 populations developed Col-like symptoms with a 69-72%  
288 frequency, indicating that a homozygous line of *nced9* is required for CaMV resistance  
289 (supplementary Figure S4B). Plant resistance to viruses can be specific to the virus species and  
290 sometimes even the viral strain (Takahashi *et al.*, 2002). The *nced9* mutant is resistant to two  
291 strains of CaMV, the milder CM184I and the more virulent Cabb B-JI strain (supplementary Figure  
292 4C), but susceptible to infections with TuMV and *Turnip rosette virus* (TRoV) (supplementary  
293 Figure S4D). Thus, NCED9 appears to be a CaMV specific susceptibility factor. CaMV RNAs are  
294 very stable and can accumulate to high levels despite reduction in viral DNA (Hoffmann *et al.*,  
295 2022). In *nced9*, all three major viral RNA species were reduced, but not as drastic as the viral  
296 DNA (Figure 3B and Figure 5E), but still a remarkable inhibition of infection.

297

## 298 **Exogenous ABA application enhances CaMV accumulation in Col-0**

299 The established role of NCED9 in ABA biosynthesis prompted us to investigate the involvement  
300 of ABA during CaMV infection. ABA plays multifaceted roles during plant pathogen interactions  
301 and exogenous ABA application was found to either increase or reduce pathogen load *in planta*  
302 (Alazem *et al.*, 2014). We treated seedlings with ABA 24h before infection with CaMV and once

303 a week throughout the 3-week infection time course, the last treatment being 24h before harvest  
304 of the whole rosette. Exogenous ABA spray application reduced Col-0 rosette growth in a  
305 concentration dependent manner (Figure 6A & B). The *nced9* plants behaved comparable to Col-  
306 0, showing that the line has not lost its sensitivity to ABA (Figure 6A & B). The well-described  
307 *aba2* mutant accumulates about 20-25% of wildtype ABA levels during undisturbed growth  
308 (González-Guzmán *et al.*, 2002), has a severe growth phenotype and is prone to wilting (Figure  
309 6A). The *aba2* growth phenotype was fully rescued by exogenous ABA spraying, suggesting  
310 successful application (Figure 6B). CaMV accumulation in Col-0 was not affected after spraying  
311 with low concentrations of ABA (10 or 50  $\mu$ M), but 100  $\mu$ M and more strongly 200  $\mu$ M increased  
312 viral DNA content (Figure 6C). Likewise, while virus levels were reduced in non-treated *aba2-1*  
313 plants, virus load significantly increased upon 200  $\mu$ M ABA spray (Figure 6C). Intriguingly,  
314 exogenous ABA application had no effect on CaMV accumulation in the *nced9* background,  
315 seemingly uncoupling the function of *NCED9* in CaMV infection from bulk ABA synthesis  
316 (Figure 6C). The phenolic antioxidant Nordihydroguaiaretic acid (NDGA) is a commonly used  
317 inhibitor of lipoxygenases (NCEDs) and as such is an inhibitor of ABA synthesis (Han *et al.*, 2004;  
318 Creelman *et al.*, 1992). NDGA has been used previously in plant-virus studies and either made the  
319 plants more susceptible to the virus (He *et al.*, 2021) or reduced viral load *in planta* (Alazem *et*  
320 *al.*, 2014). We observed that NDGA treatment decreased plant growth in uninfected plants (Figure  
321 6A), but also that NDGA treatment increased CaMV DNA accumulation in Col-0 and *aba2-1*,  
322 while it had no effect on virus accumulation in *nced9* (Figure 6D). These results suggests that  
323 disturbance of ABA homeostasis, rather than ABA levels might aid virus accumulation. We used  
324 CaMV transcriptome data (Chesnais *et al.*, 2022) to visualize the effect of CaMV infection on  
325 ABA responsive genes in four week old rosettes (Hoth *et al.*, 2002). CaMV infection altered the  
326 expression of positively and negatively ABA-regulated genes drastically and in an unspecific  
327 manner, indicating a disturbance in ABA signaling pathways (Figure 6E and F, supplementary  
328 Table S8). To validate that these changes hold true in our experimental conditions, we chose four  
329 ABA responsive genes that are downregulated during CaMV infection according to the  
330 transcriptomics data and tested their expression with qRT-PCR, indeed confirming their strong  
331 transcriptional repression during CaMV infection (Figure 6G). Taken together, our data suggest  
332 that CaMV infection benefits from the disturbance of ABA homeostasis, probably through the  
333 miss regulation ABA-dependent pathways that ultimately helps viral accumulation. But detailed

334 importance of NCED9 for CaMV as part of these ABA-related mechanisms remains to be  
335 determined.

## 336 DISCUSSION

337 Plants can exhibit amazing plasticity in response to pathogens and the Arabidopsis/CaMV  
338 pathosystem is no exception. Arabidopsis is a natural host of CaMV and possibly evolved under  
339 CaMV pressure, as proposed for other naturally infecting Arabidopsis viruses (Montes *et al.*,  
340 2019). In our conditions, Arabidopsis exhibited a wide spectrum of responses to CaMV that ranged  
341 from no symptoms and no viral accumulation to full susceptibility with strong symptoms and high  
342 viral accumulation. Notably, we found tolerant and hypersensitive accessions as well, once again  
343 exemplifying that symptom severity and virus accumulation are largely uncoupled between host  
344 genotypes and that both resistance and tolerance mechanisms shape plant-virus interactions  
345 (Figure 7) (Bergès *et al.*, 2021; Rubio *et al.*, 2019; Pagán *et al.*, 2007). The defiance of pathogen-  
346 load/symptom connections (“tolerance”) has been reported in other infection-systems, including  
347 bacteria and fungi (Gambetta *et al.*, 2007; Chen *et al.*, 2004), although, examples of clear  
348 resistance trajectories also exist, for example for *Pseudomonas syringae* on Arabidopsis that shows  
349 strong positive correlation between symptom severity and bacterial density (Kover & Schaal,  
350 2002). CaMV causes moderate symptoms in most accessions, a trend also seen with TuMV in  
351 1050 Arabidopsis accessions (Butkovic *et al.*, 2022) and in line with the theory that viruses evolve  
352 for an intermediate severity to balance replication and host survival (Torres-Barceló *et al.*, 2010).  
353 Four accessions (En-2, Wil-2, Sv-0 and Tsu-0) had been previously reported resistant to CaMV  
354 infection (Leisner & Howell, 1992). Through our study we have found two additional fully  
355 resistant accessions PHW-3 and IP-Oja-0. In accordance, the En-2 resistance locus (CAR1) co-  
356 segregates with the microsatellite marker nga128 on chromosome 1 (Callaway *et al.*, 1996) and is  
357 broken by the P1 protein of CaMV strain NY8153 (Adhab *et al.*, 2018), while resistance in Tsu-0  
358 is broken by P6, pointing towards individual resistance mechanisms between the accessions  
359 (Hapiak *et al.*, 2008).

360 Virus disease in plants is affected by the environment, as well as the genotype of virus and host,  
361 the “disease triangle, and manipulation of any edge of this triangle will affect the outcome of virus  
362 infection (Hily *et al.*, 2016). By controlling for environmental factors in standardized laboratory  
363 conditions, as well as for virus genotype by directed infiltration with one strain, we can elucidate

364 the effect of host genotype on CaMV infection in Arabidopsis, through genome-wide association  
365 mapping. Previous GWA mappings in Arabidopsis/virus systems have identified resistance loci  
366 for the potyvirus Turnip mosaic virus (TuMV), including the well-studied RESTRICTED TEV  
367 MOVEMENT 3 (*RTM3*) gene (Rubio *et al.*, 2019; Pagny *et al.*, 2012; Cosson *et al.*, 2010) and  
368 novel regulators of RNA silencing during CMV infection (Liu *et al.*, 2022). Our GWA mapping  
369 identified numerous SNPs associated with differences in CaMV accumulation in agreement with  
370 the diverse challenges virus infections impose on host cells. Importantly, no resistance gene is  
371 known for Caulimoviruses, except the *CARI* locus in the Arabidopsis En-2 accession which has  
372 not been further mapped (Adhab *et al.*, 2018). Nonetheless, several genes involved in various  
373 cellular homeostatic processes have been identified through genetic studies that influence CaMV  
374 accumulation (Hoffmann *et al.*, 2022; Shukla *et al.*, 2021; Hafren *et al.*, 2017; Schepetilnikov *et*  
375 *al.*, 2011; Love *et al.*, 2005). Eight out of the 15 T-DNA insertion lines we tested displayed reduced  
376 CaMV accumulation in the Col-0 background compared to Col-0 wild type, which appears high  
377 as SNPs identified via GWA are frequently effective only in their natural genetic background  
378 (Gallois *et al.*, 2018; Corwin *et al.*, 2016). Notably, none of these eight genes had previously been  
379 associated with CaMV disease, underscoring the potential of GWAS to uncover the hidden CaMV  
380 disease genes. All of them appear as susceptibility factors for CaMV, as their deletion negatively  
381 affects virus accumulation. This could either point to the importance of recessive resistance against  
382 CaMV, or more efficient identification of susceptibility factors our GWAS. Even though the  
383 identified SNP for *NCED9* has a low allele frequency and was not among the highest scoring ones,  
384 the *nced9* mutant had by far the greatest effect and is to our knowledge the most CaMV resistant  
385 Arabidopsis T-DNA insertion mutant identified so far. The same T-DNA line has been commonly  
386 used and well described for ABA experiments during seed germination, where *NCED9* together  
387 with *NCED6* is the main biosynthesis gene (Lefebvre *et al.*, 2006; Tan *et al.*, 2003b). To our  
388 surprise the *nced9* resistance phenotype to CaMV infection and CaMV cannot be rescued by  
389 exogenous ABA spray unlike the *aba2-1* mutant. Two other viruses were able to systemically  
390 spread through *nced9* and cause wildtype like symptoms, indicating that the resistance is specific  
391 for CaMV. While we could not determine yet which function of *NCED9* is essential for CaMV  
392 infection, the drastic defect in *nced9* mutant warrants more attention.

393 Interestingly, even though the virus accumulation defect in *nced9* could not be alleviated by  
394 exogenous ABA application during CaMV infection, ABA hormone levels had an impact on

395 CaMV accumulation. Plant hormones are an integral part of signaling mechanisms in response to  
396 biotic and abiotic environmental stimuli (Verma *et al.*, 2016). The level and inducibility of  
397 hormonal responses exhibits a large range between Arabidopsis accessions, as identified for the  
398 major stress hormones Salicylic acid (Bruessow *et al.*, 2021) and ABA (Kalladan *et al.*, 2017).  
399 Upon pathogen attack, ABA mediates the closure of stomata and deposition of callose at the  
400 plasmodesmata to slow the spread of the pathogen (Ton *et al.*, 2009). While callose deposition  
401 could reduce plasmodesmal trafficking of CaMV as observed for many other viruses (Zavaliev *et*  
402 *al.*, 2013; Li *et al.*, 2012; Iglesias & Meins, 2000), this is unlikely as spraying with ABA increased  
403 systemic CaMV accumulation. Additionally, ABA antagonizes the salicylic acid (SA) mediated  
404 systemic acquired resistance (SAR), which could make it a general target of pathogens to subvert  
405 the antimicrobial SAR (Yasuda *et al.*, 2008) and could be used by CaMV to escape SAR (Love *et*  
406 *al.*, 2005). Yet, for virus infections including CaMV, the role of ABA appears complex. Increased  
407 ABA content was measured in *Nicotiana tabacum* after TMV infection (Whenham *et al.*,  
408 1986), in rice after *Rice stripe virus* infection (Cui *et al.*, 2021), and Cucumber mosaic virus  
409 (Alazem *et al.*, 2014), but not PPV infection in *Arabidopsis thaliana* (Pasin *et al.*, 2020). Further  
410 treatment with ABA increased plant resistance to *Tobacco mosaic virus* (Chen *et al.*, 2013), *Plum*  
411 *pox virus* (Pasin *et al.*, 2020), *Chinese wheat mosaic virus* (He *et al.*, 2021) and *Bamboo mosaic*  
412 *virus* (BaMV) in Arabidopsis (Alazem *et al.*, 2014) as well as reduced the lesion size in local  
413 infections of *Tobacco necrosis virus* (TNV) (Iriti & Faoro, 2008). CaMV on the other hand,  
414 accumulated to higher levels upon plant treatment with ABA, in line with a reduction in the *aba2*  
415 mutant that was furthermore rescued by ABA application. However, the strong increase in CaMV  
416 accumulation upon treatment with the NGDA inhibitor of the ABA biosynthetic NCED family is  
417 difficult to understand but notably, ABA and NDGA also acted similarly in that both reduced  
418 BaMV accumulation in Arabidopsis (Alazem *et al.*, 2014). Thus, our data suggests that CaMV  
419 benefits from disruption of ABA homeostasis and indeed, we also found that ABA responsive  
420 genes are widely affected by CaMV and highly deregulated when compared to ABA treatment  
421 (Hoth *et al.*, 2002). This could at least partially be attributable to the CaMV P6 protein interacting  
422 with and repressing the function of histone deacetylase H2DC, a regulator of ABA-mediated gene  
423 expression (Li *et al.*, 2021; Sridha & Wu, 2006).

424 Taken together, GWA is a powerful tool to identify novel players for DNA virus disease. The large  
425 plasticity of Arabidopsis towards CaMV and the independent resistant lines indicate independently



426 evolved resistance mechanism that should be explored further. We found evidence that resistance,  
427 as well as tolerance mechanisms play a role during CaMV infection. And lastly, ABA was found  
428 as a novel inducer of CaMV accumulation and CaMV infection drastically miss regulates ABA  
429 responsive genes.

430

431

## 432 **Supplementary Data**

433 The following supplementary data are available at JXB online.

434 Supplementary Dataset S1 contains supplementary Figure S1-S3

435 Supplementary Figure S1: Additional information in Arabidopsis accessions

436 Supplementary Figure S2: Correlations between CaMV and CMV data

437 Supplementary Figure S3: Manhattan plots of GWA-mapping for symptoms and rel. fresh weight

438 Supplementary Figure S4: Phenotypes of *nced9* and Col-0 plants in different growth conditions

439

440 Supplementary Dataset S2 contains supplementary Table S1-S9

441 Supplementary table S1: Arabidopsis accessions used in this study.

442 Supplementary table S2: T-DNA lines used in this study with primers used for their confirmation.

443 Supplementary table S3: Symptom and relative fresh weight data by accessions.

444 Supplementary table S4: Relative CaMV accumulation in two replicates by accessions.

445 Supplementary table S5: SNPs that above GWA-score 5 and MAC  $\geq 5$ .

446 Supplementary table S6: Genetic elements in 2 kb window of SNPs.

447 Supplementary table S7: Arabidopsis accessions harboring NCED9 415L.

448 Supplementary table S8: ABA responsive genes and their expression during CaMV infection.

449 Supplementary table S9: Primers used in this study.

450

## 451 **Acknowledgements**

452 We'd like to thank Magnus Nordborg for sharing plant material and Thomas Ellis for his insights  
453 on GWAS and thoughtful reading of the manuscript. We are thankful to Roger Ling and Andrew  
454 Firth for sharing their infectious TRoV clone.

455

456 **Author contributions**

457 Conceptualization – GH, AH; Investigation – GH, AS, SL; Formal analysis – GH; AS  
458 Visualization – GH; Writing – original draft – GH, AH; Funding acquisition – GH, AH

459 **Conflict of interest**

460 No conflict of interest declared.

461 **Funding statement**

462 This work was supported by the Royal Physiographic Society of Lund’s Nilsson-Ehle  
463 Endowments (“Genetic Basis of Broad Spectrum Tolerance to Virus Infection in Plants”) for GH  
464 and SLU plant biology department funding for AH.

465 **Data availability**

466 All data supporting the findings of this study are available within the paper and within its  
467 supplementary materials published online.

468

469

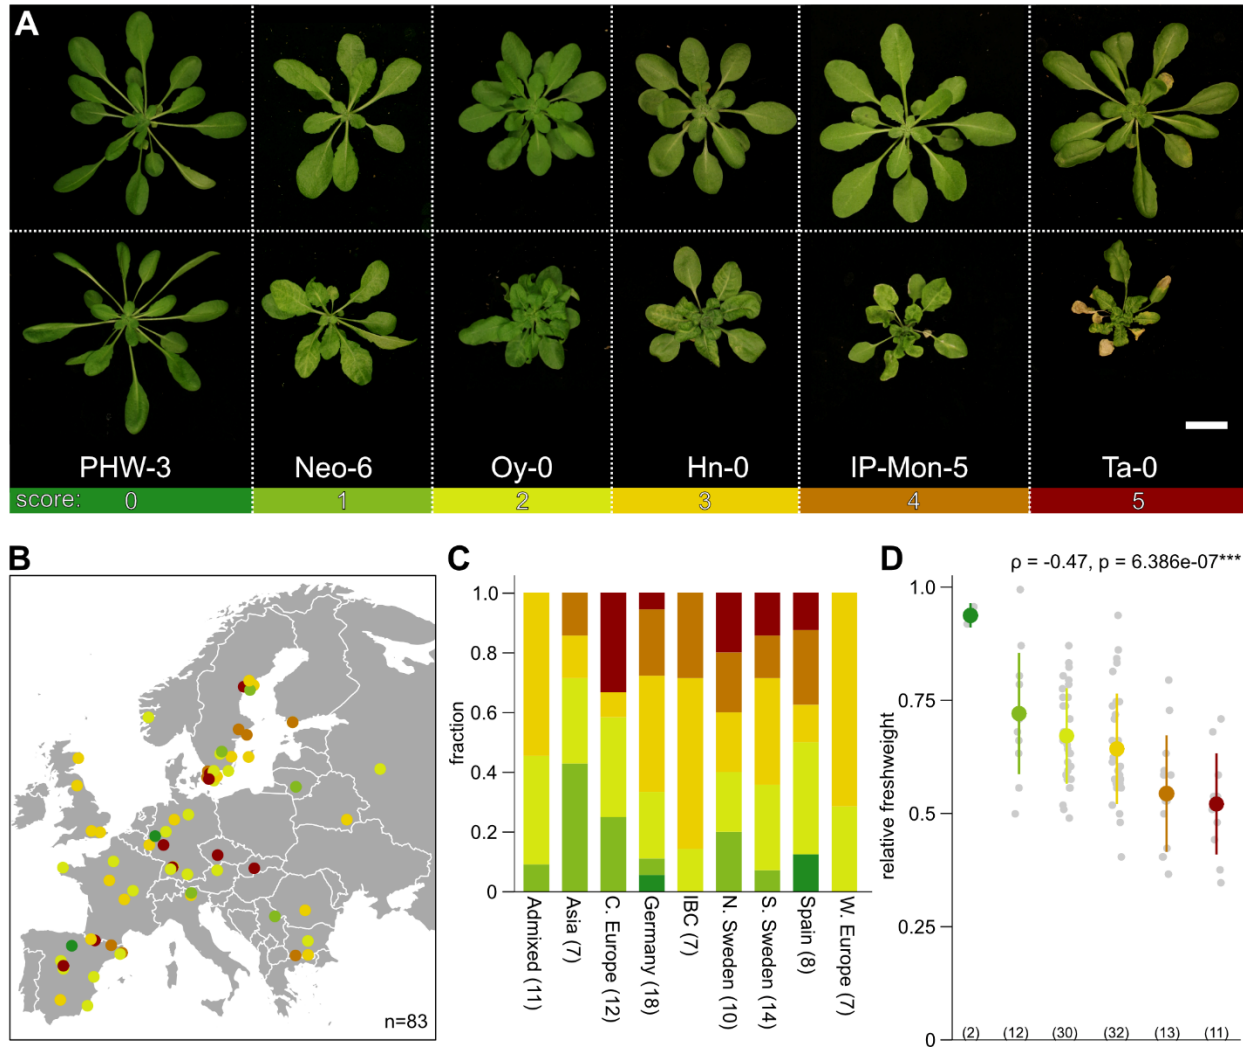

470

471 **Figure 1: The broad spectrum of CaMV disease in Arabidopsis**

472 (A) Representative images of symptom range induced by CaMV infection 21 dpi. Upper panel: mock infected plants,  
473 lower panel: CM1841 infected plants. Accession identifier is written below. Colors correspond to symptom categories.  
474 Scale bar = 2 cm

475 (B) Geographical distribution of 83 Arabidopsis accessions from Europe, representing 83% of examined accessions.  
476 Dot colors indicate symptom categories.

477 (C) Fraction of symptom categories divided by Admixture groups. Number of accessions in each admixture group is  
478 indicated in brackets. (IBC = Italy\_Balkan\_Caucasus C = Central, N = North, S = South, W = Western)

479 (D) Dot blot of relative fresh weight of accessions in symptoms categories. (n) indicate numbers of accessions in each  
480 category. Coloured dot and stick represent mean  $\pm$  standard deviation. Grey dots represent individual accessions.  
481 Correlation was calculated with Spearman rank test.

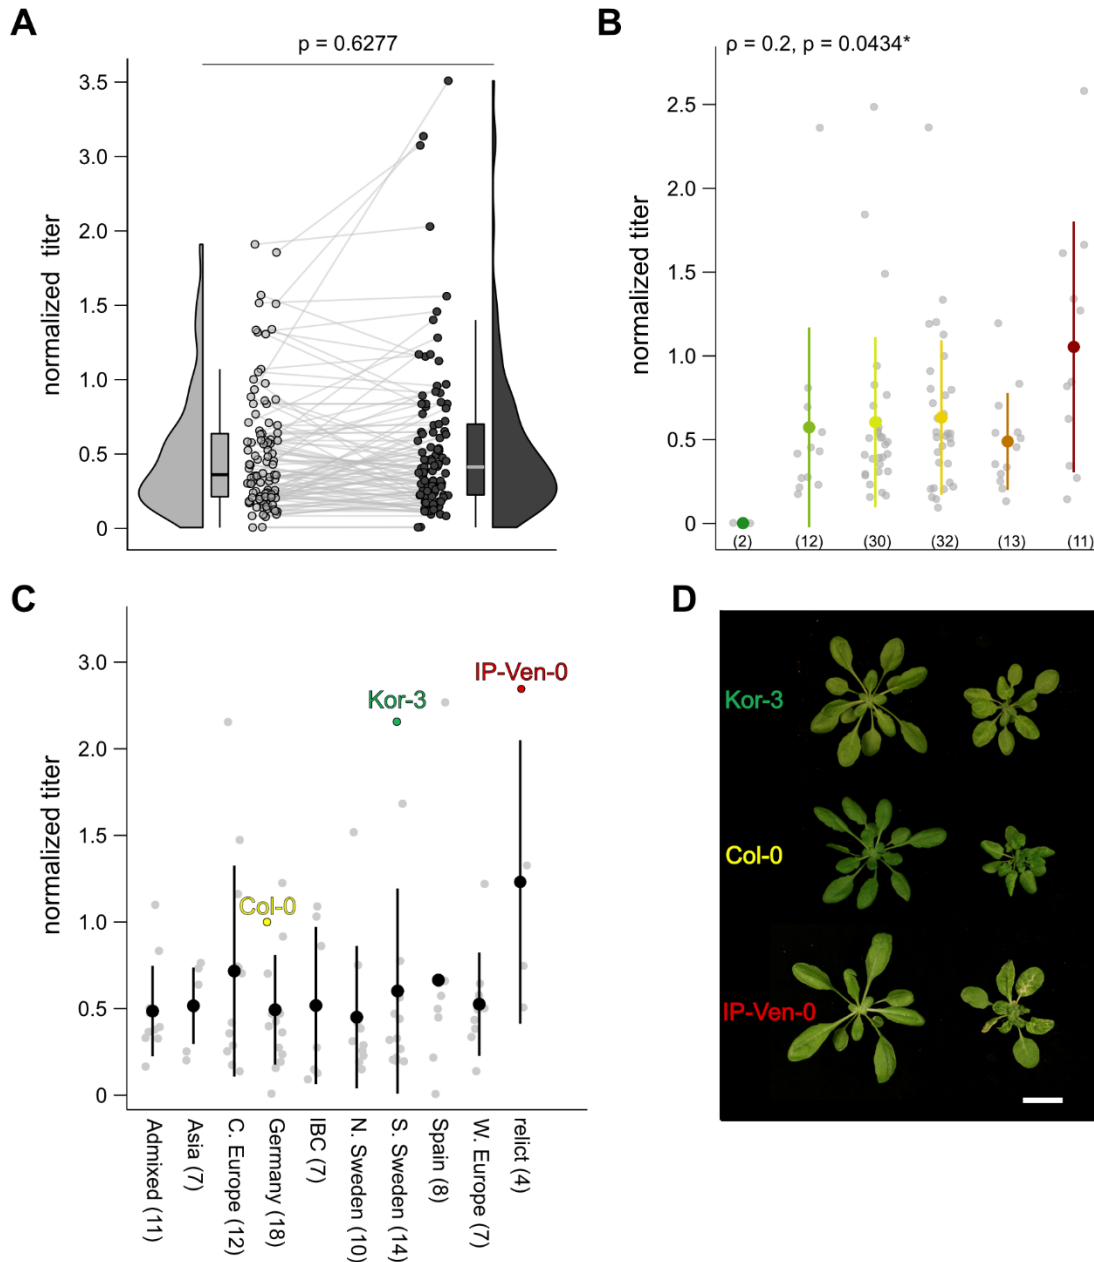

482

483 **Figure 2: CaMV accumulation only weakly correlates with Arabidopsis symptoms**

484 (A) Raincloud plot of CaMV DNA accumulation in 100 accession 21 dpi in two independent replicates. P-value was  
 485 calculated by Kruskal-Wallis rank sum test.

486 (B) Dot blot of CaMV DNA accumulation between symptoms categories. (n) indicate numbers of accessions in each  
 487 category. Colour corresponds to symptom categories (Figure 1A). Coloured dot and stick represent mean  $\pm$  standard  
 488 deviation. Grey dots represent individual accessions.

489 (C) Dot blot of CaMV DNA accumulation between Admixture groups. Accessions depicted in (D) are highlighted.  
 490 Number of accessions in each admixture group is indicated in brackets. Black dot and stick represent mean  $\pm$  standard  
 491 deviation. Grey dots represent individual accessions.

492 (D) Representative image of accessions xxx and Col-0. Both accessions accumulate twice as much CaMV DNA as  
 493 Col-0 but fall on either side of Col-0 on the disease spectrum. Scale bar = 2 cm

494

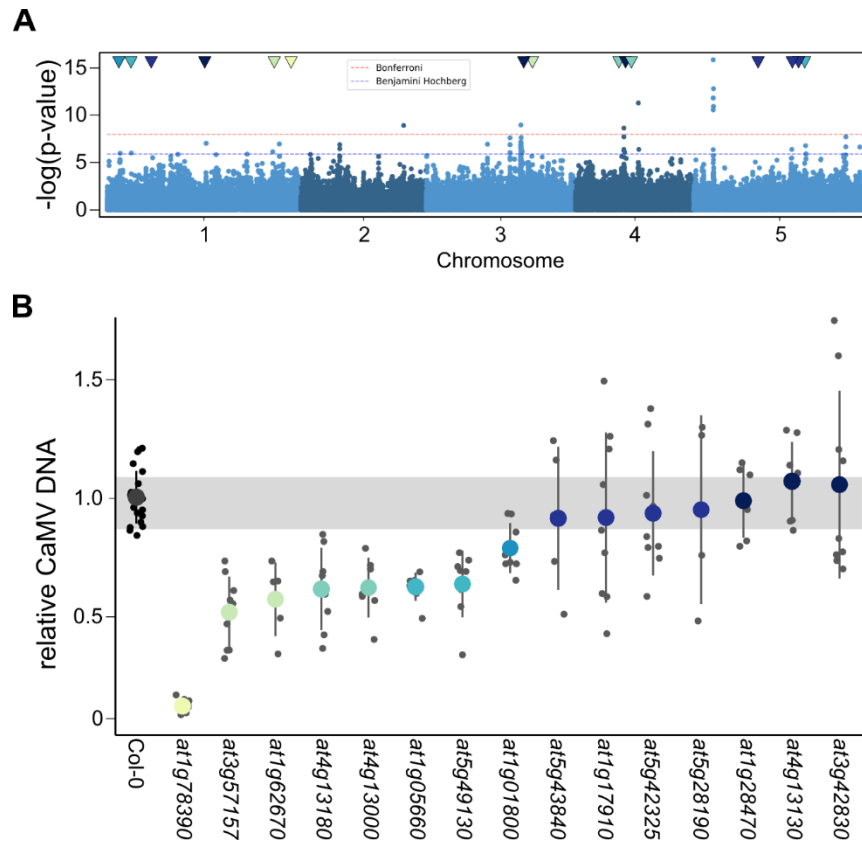

495

496 **Figure 3: Genome-wide association mapping of CaMV accumulation and candidate screening**

497 (A) Manhattan plot of GWA results for CaMV accumulation in 100 natural accessions. Blue shading corresponds to  
498 the five Arabidopsis chromosomes. Blue lines indicate significance threshold after Benjamini-Hochberg correction,  
499 red line represents the more stringent Bonferroni multiple testing correction.

500 (B) Relative CaMV DNA accumulation in T-DNA lines of GWA candidates (indicated by ATG-number) at 21 dpi  
501 compared to Col-0 wild type. n = 4-22. T-DNA lines are listed in supplementary dataset2 Table S2. Colored dot and  
502 stick represent mean  $\pm$  standard deviation. Grey dots represent individual accessions. Grey bar represents standard  
503 deviation of Col-0.

504



505

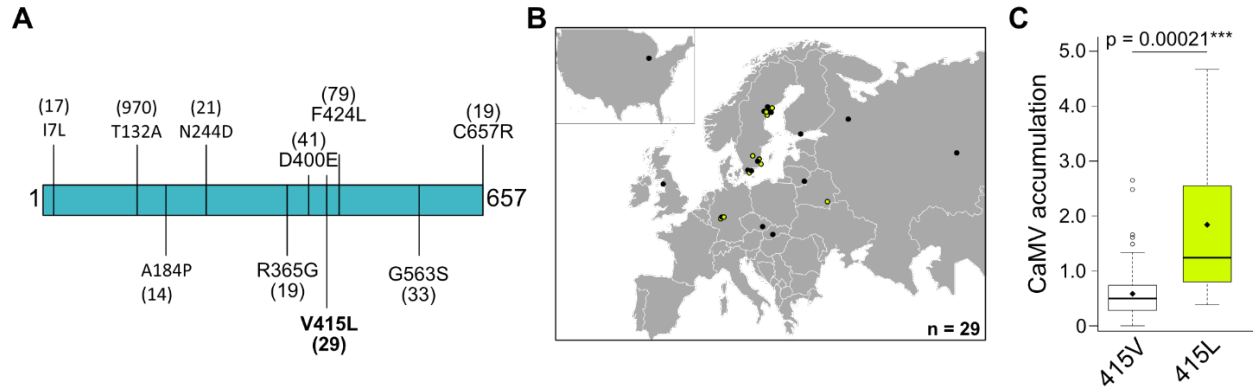

506

507 **Figure 4: Allelic variation in NCED9 influences CaMV accumulation**

508 **(A)** Graphic representation of NCED9 protein (657 AA) with AA substitutions due to SNPs present in more than 10

509 accessions annotated from POLYMORPH 1001 browser.

510 **(B)** Geographical distribution of 29 Arabidopsis accessions harbouring NCED9-415L. Yellow dots indicate accessions

511 in our collection used for CaMV experiments.

512 **(C)** CaMV DNA accumulation relative to Col-0 in NCED9-415V accessions (n=95) and NCED9-415L (n=10)

513 accessions. P-value was calculated using pairwise Wilcoxon rank sum test with continuity correction.

514

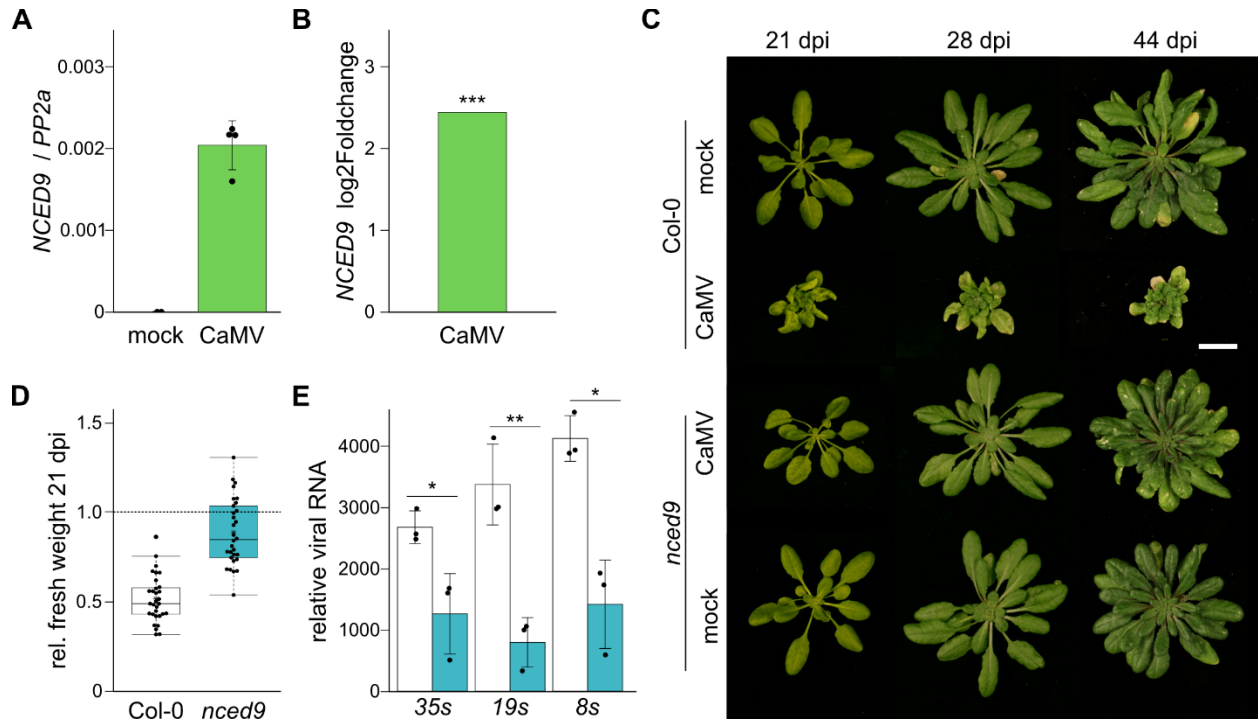

515

516 **Figure5: *nced9* is resistant to CaMV infection**

517 (A) qRT-PCR of relative transcript accumulation of *NCED9* in mock and CaMV infected Col-0 plants at 21 dpi  
518 normalized to PP2a. n=4

519 (B) Log2foldchange of *NCED9* in CaMV infected compared to mock plants in the transcriptome dataset of (Chesnais  
520 *et al.*, 2022)

521 (C) Representative image of Col-0 and *nced9* plants after 21, 28 or 44 days after infection with CM184I. Scalebar =  
522 2 cm

523 (D) Relative fresh weight of infected Col-0 and *nced9* plants at 21 dpi. Red line indicates mock.

524 (E) qRT-PCR of relative transcript accumulation of viral RNAs in Col-0 and *nced9* plants at 21 dpi normalized to  
525 PP2a. n=3

526

527

528

529

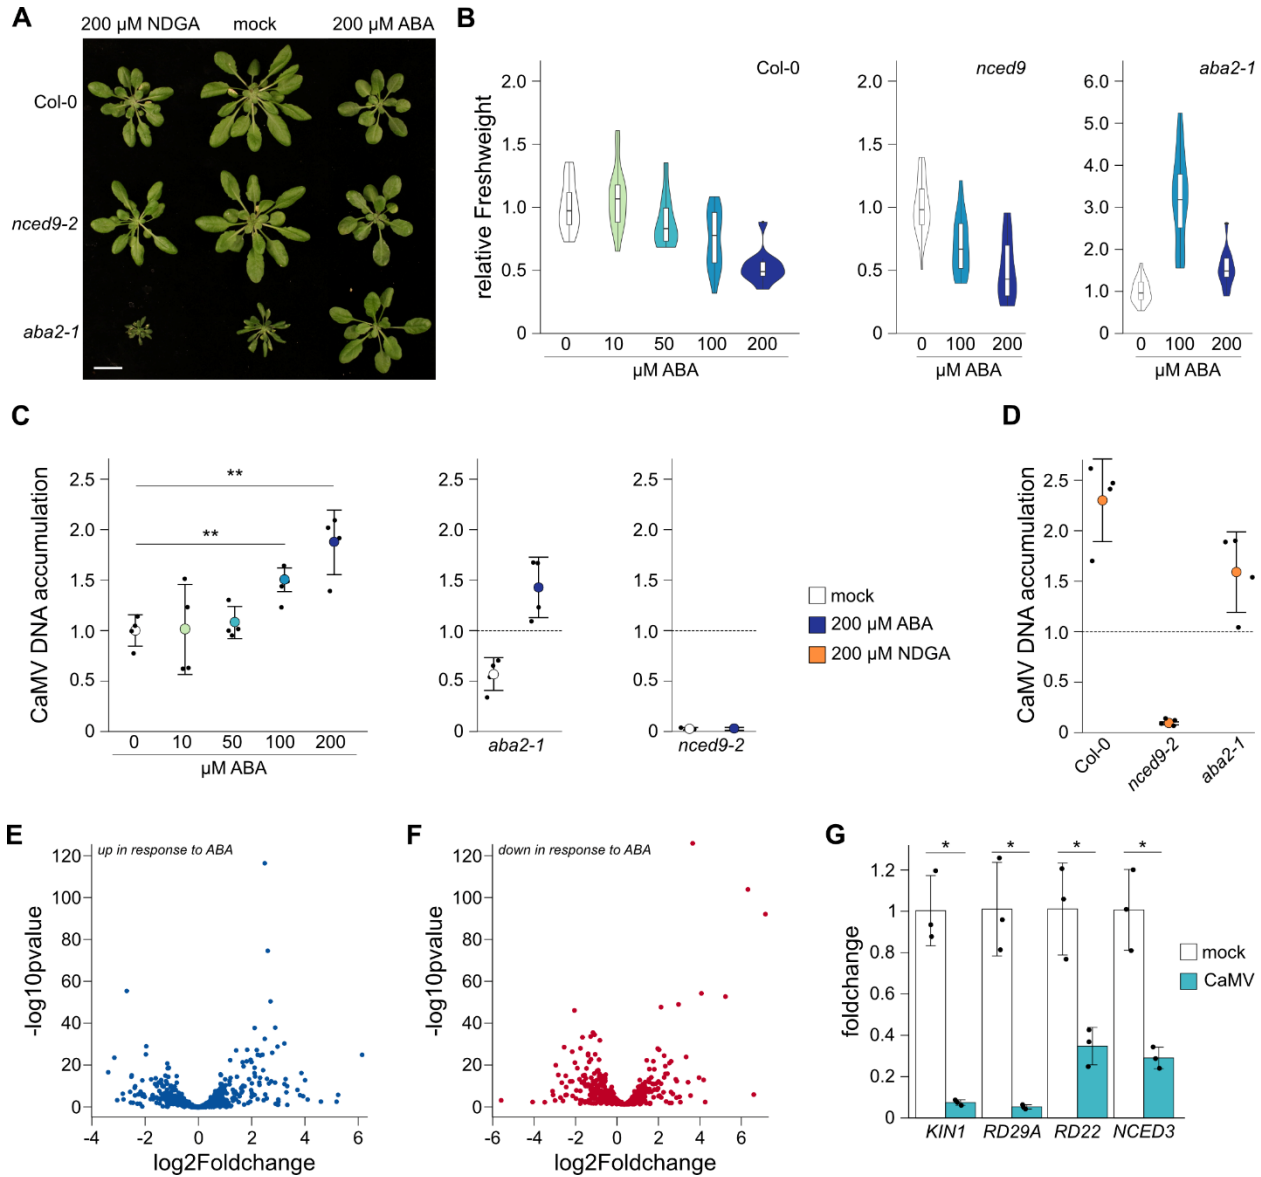

530

531 **Figure 6: exogenous application ABA enhances CaMV accumulation in a dose dependent manner**

532 (A) Representative image of mock inoculated plants after three treatments with either ABA or NDGA. Scalebar = 2

533 cm.

534 (B) Violin plot of relative fresh weight of mock inoculated Col-0 (left panel), *nced9* (middle panel) and *aba2* (right

535 panel) plants after three treatments with indicated concentrations of ABA.

536 (C) Relative CaMV DNA accumulation at 21 dpi in Col-0 (left panel), *aba2* (middle panel) and *nced9* (right panel)

537 after three treatments with indicated ABA concentrations n = 4

538 (D) Relative CaMV DNA accumulation at 21 dpi in indicated genotypes after three treatments with 200 μM NDGA

539 n = 4

540 (E) Log<sub>2</sub>foldchange of ABA responsive genes (“upregulated after ABA treatment”, n=651, (Hoth *et al.*, 2002)) in

541 CaMV infected compared to mock plants in the transcriptome dataset of (Chesnais *et al.*, 2022)

542 (F) Log<sub>2</sub>foldchange of ABA responsive genes (“downregulated after ABA treatment”, n=680, (Hoth *et al.*, 2002)) in

543 CaMV infected compared to mock plants in the transcriptome dataset of (Chesnais *et al.*, 2022)

544 (G) relative transcript accumulation of ABA responsive genes (from category “up”) in Col-0 plants at 21 dpi mock or

545 CaMV infection normalized to PP2a. n=3

546

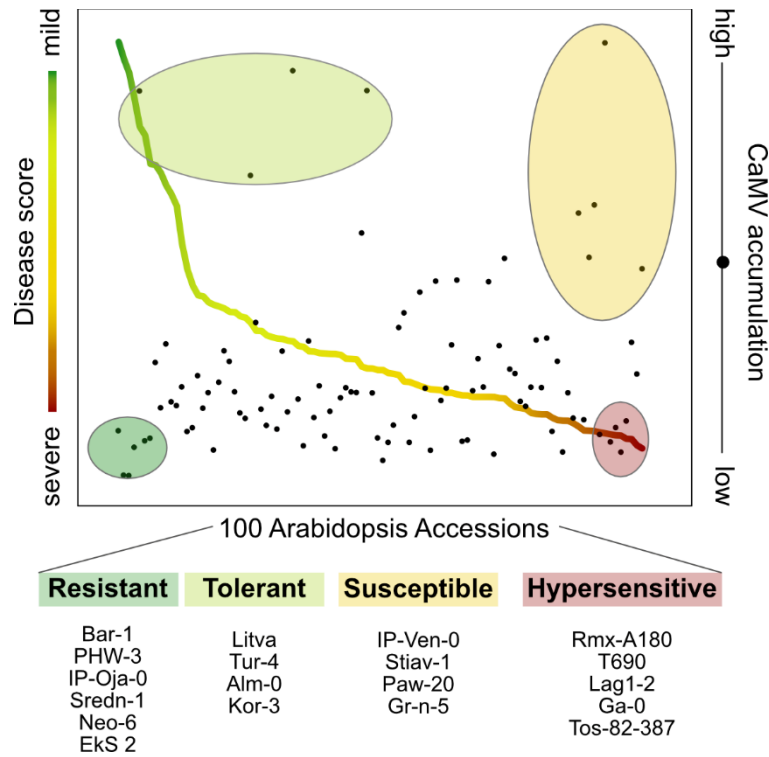

547

548 **Figure 7: Tolerance and resistance shape CaMV disease in Arabidopsis thaliana**  
 549 Line plot of disease score (rel FW / symptom category) color coded by symptom category overlaid with scatterplot of  
 550 CaMV accumulation within the same accession. Identified groups are circled and color coded for their response.  
 551 Accessions within the circles are written below the graph and named by their accession identifier.

552

## References

- Adhab, M., Angel, C., Leisner, S. & Schoelz, J.E. (2018). The P1 gene of Cauliflower mosaic virus is responsible for breaking resistance in *Arabidopsis thaliana* ecotype Enkheim (En-2). *Virology*, 523, pp. 15-21.
- Alazem, M., Lin, K.-Y. & Lin, N.-S. (2014). The abscisic acid pathway has multifaceted effects on the accumulation of Bamboo mosaic virus. *Molecular plant-microbe interactions*, 27(2), pp. 177-189.
- Allen, M., Poggiali, D., Whitaker, K., Marshall, T.R. & Kievit, R.A. (2019). Raincloud plots: a multi-platform tool for robust data visualization. *Wellcome open research*, 4.
- Bartoli, C. & Roux, F. (2017). Genome-Wide Association Studies In Plant Pathosystems: Toward an Ecological Genomics Approach. *Frontiers in Plant Science*, 8.
- Benjamini, Y. & Hochberg, Y. (1995). Controlling the False Discovery Rate: A Practical and Powerful Approach to Multiple Testing. *Journal of the Royal Statistical Society: Series B (Methodological)*, 57(1), pp. 289-300.
- Bergès, S.E., Vasseur, F., Bediée, A., Rolland, G., Masclef, D., Dauzat, M., van Munster, M. & Vile, D. (2020). Natural variation of *Arabidopsis thaliana* responses to Cauliflower mosaic virus infection upon water deficit. *PLoS pathogens*, 16(5), p. e1008557.
- Bergès, S.E., Vile, D., Yvon, M., Masclef, D., Dauzat, M. & van Munster, M. (2021). Water deficit changes the relationships between epidemiological traits of Cauliflower mosaic virus across diverse *Arabidopsis thaliana* accessions. *Scientific Reports*, 11(1), p. 24103.
- Bruessow, F., Bautor, J., Hoffmann, G., Yildiz, I., Zeier, J. & Parker, J.E. (2021). Natural variation in temperature-modulated immunity uncovers transcription factor bHLH059 as a thermoresponsive regulator in *Arabidopsis thaliana*. *PLOS Genetics*, 17(1), p. e1009290.
- Butkovic, A., Ellis, T.J., González, R., Jaegle, B., Nordborg, M. & Elena, S.F. (2022). A globally distributed major virus-resistance association in *Arabidopsis thaliana*. *bioRxiv*.
- Butković, A., González, R., Rivarez, M.P.S. & Elena, S.F. (2021). A genome-wide association study identifies *Arabidopsis thaliana* genes that contribute to differences in the outcome of infection with two Turnip mosaic potyvirus strains that differ in their evolutionary history and degree of host specialization. *Virus Evol*, 7(2), p. veab063.
- Callaway, A., Liu, W., Andrianov, V., Stenzler, L., Zhao, J., Wettlaufer, S., Jayakumar, P. & Howell, S.H. (1996). Characterization of cauliflower mosaic virus (CaMV) resistance in virus-resistant ecotypes of *Arabidopsis*. *Mol Plant Microbe Interact*, 9(9), pp. 810-8.
- Cao, J., Schneeberger, K., Ossowski, S., Günther, T., Bender, S., Fitz, J., Koenig, D., Lanz, C., Stegle, O., Lippert, C., Wang, X., Ott, F., Müller, J., Alonso-Blanco, C., Borgwardt, K., Schmid, K.J. & Weigel, D. (2011). Whole-genome sequencing of multiple *Arabidopsis thaliana* populations. *Nat Genet*, 43(10), pp. 956-63.
- Cecchini, E., Al-Kaff, N.S., Bannister, A., Giannakou, M.E., McCallum, D.G., Maule, A.J., Milner, J.J. & Covey, S.N. (1998). Pathogenic interactions between variants of cauliflower mosaic virus and *Arabidopsis thaliana*. *Journal of Experimental Botany*, 49(321), pp. 731-737.
- Chen, L., Zhang, L., Li, D., Wang, F. & Yu, D. (2013). WRKY8 transcription factor functions in the TMV-cg defense response by mediating both abscisic acid and ethylene signaling in *Arabidopsis*. *Proceedings of the National Academy of Sciences of the United States of America*, 110(21), pp. E1963-E1971.

- Chen, P., Lee, B. & Robb, J. (2004). Tolerance to a non-host isolate of *Verticillium dahliae* in tomato. *Physiological and Molecular Plant Pathology*, 64(6), pp. 283-291.
- Chesnais, Q., Golyaev, V., Velt, A., Rustenholz, C., Brault, V., Pooggin, M.M. & Drucker, M. (2022). Comparative Plant Transcriptome Profiling of *Arabidopsis thaliana* Col-0 and *Camelina sativa* var. Celine Infested with *Myzus persicae* Aphids Acquiring Circulative and Noncirculative Viruses Reveals Virus- and Plant-Specific Alterations Relevant to Aphid Feeding Behavior and Transmission. *Microbiol Spectr*, 10(4), p. e0013622.
- Consortium, G. (2016). 1,135 Genomes Reveal the Global Pattern of Polymorphism in *Arabidopsis thaliana*. *Cell*, 166(2), pp. 481-491.
- Cooper, J. & Jones, A. (1983). Responses of plants to viruses: proposals for the use of terms. *Phytopathology*, 73(2), pp. 127-128.
- Corwin, J.A., Copeland, D., Feusier, J., Subedy, A., Eshbaugh, R., Palmer, C., Maloof, J. & Kliebenstein, D.J. (2016). The Quantitative Basis of the *Arabidopsis* Innate Immune System to Endemic Pathogens Depends on Pathogen Genetics. *PLoS Genet*, 12(2), p. e1005789.
- Cosson, P., Sofer, L., Schurdi-Levraud, V. & Revers, F. (2010). A member of a new plant gene family encoding a meprin and TRAF homology (MATH) domain-containing protein is involved in restriction of long distance movement of plant viruses. *Plant Signaling & Behavior*, 5(10), pp. 1321-1323.
- Creelman, R.A., Bell, E. & Mullet, J.E. (1992). Involvement of a Lipoxygenase-Like Enzyme in Abscisic Acid Biosynthesis 1. *Plant physiology*, 99(3), pp. 1258-1260.
- Cui, W., Wang, S., Han, K., Zheng, E., Ji, M., Chen, B., Wang, X., Chen, J. & Yan, F. (2021). Ferredoxin 1 is downregulated by the accumulation of abscisic acid in an ABI5-dependent manner to facilitate rice stripe virus infection in *Nicotiana benthamiana* and rice. *The Plant Journal*, 107(4), pp. 1183-1197.
- Gallois, J.L., Moury, B. & German-Retana, S. (2018). Role of the Genetic Background in Resistance to Plant Viruses. *Int J Mol Sci*, 19(10).
- Gambetta, G.A., Fei, J., Rost, T.L. & Matthews, M.A. (2007). Leaf scorch symptoms are not correlated with bacterial populations during Pierce's disease. *Journal of Experimental Botany*, 58(15-16), pp. 4037-4046.
- Gan, X., Stegle, O., Behr, J., Steffen, J.G., Drewe, P., Hildebrand, K.L., Lyngsoe, R., Schultheiss, S.J., Osborne, E.J., Sreedharan, V.T., Kahles, A., Bohnert, R., Jean, G., Derwent, P., Kersey, P., Belfield, E.J., Harberd, N.P., Kemen, E., Toomajian, C., Kover, P.X., Clark, R.M., Rätsch, G. & Mott, R. (2011). Multiple reference genomes and transcriptomes for *Arabidopsis thaliana*. *Nature*, 477(7365), pp. 419-423.
- Garcia-Ruiz, H., Takeda, A., Chapman, E.J., Sullivan, C.M., Fahlgren, N., Brempelis, K.J. & Carrington, J.C. (2010). *Arabidopsis* RNA-dependent RNA polymerases and dicer-like proteins in antiviral defense and small interfering RNA biogenesis during Turnip Mosaic Virus infection. *Plant Cell*, 22(2), pp. 481-96.
- González-Guzmán, M., Apostolova, N., Bellés, J.M., Barrero, J.M., Piqueras, P., Ponce, M.a.R., Micol, J.L., Serrano, R.n. & Rodríguez, P.L. (2002). The Short-Chain Alcohol Dehydrogenase ABA2 Catalyzes the Conversion of Xanthoxin to Abscisic Aldehyde[W]. *The Plant Cell*, 14(8), pp. 1833-1846.
- Hafren, A., Macia, J.L., Love, A.J., Milner, J.J., Drucker, M. & Hofius, D. (2017). Selective autophagy limits cauliflower mosaic virus infection by NBR1-mediated targeting of viral capsid protein and particles. *Proc Natl Acad Sci U S A*, 114(10), pp. E2026-E2035.



- Han, S.-Y., Kitahata, N., Sekimata, K., Saito, T., Kobayashi, M., Nakashima, K., Yamaguchi-Shinozaki, K., Shinozaki, K., Yoshida, S. & Asami, T. (2004). A novel inhibitor of 9-cis-epoxycarotenoid dioxygenase in abscisic acid biosynthesis in higher plants. *Plant physiology*, 135(3), pp. 1574-1582.
- Hapiak, M., Li, Y., Agama, K., Swade, S., Okenka, G., Falk, J., Khandekar, S., Raikhy, G., Anderson, A., Pollock, J., Zellner, W., Schoelz, J. & Leisner, S.M. (2008). Cauliflower mosaic virus gene VI product N-terminus contains regions involved in resistance-breakage, self-association and interactions with movement protein. *Virus Res*, 138(1-2), pp. 119-29.
- He, L., Jin, P., Chen, X., Zhang, T.-Y., Zhong, K.-L., Liu, P., Chen, J.-P. & Yang, J. (2021). Comparative proteomic analysis of *Nicotiana benthamiana* plants under Chinese wheat mosaic virus infection. *BMC Plant Biology*, 21(1), p. 51.
- Hily, J.-M., Poulicard, N., Mora, M.-Á., Pagán, I. & García-Arenal, F. (2016). Environment and host genotype determine the outcome of a plant–virus interaction: from antagonism to mutualism. *New Phytologist*, 209(2), pp. 812-822.
- Hoffmann, G., Mahboubi, A., Bente, H., Garcia, D., Hanson, J. & Hafrén, A. (2022). Arabidopsis RNA processing body components LSM1 and DCP5 aid in the evasion of translational repression during Cauliflower mosaic virus infection. *The Plant Cell*, 34(8), pp. 3128-3147.
- Hoth, S., Morgante, M., Sanchez, J.P., Hanafey, M.K., Tingey, S.V. & Chua, N.H. (2002). Genome-wide gene expression profiling in *Arabidopsis thaliana* reveals new targets of abscisic acid and largely impaired gene regulation in the *abi1-1* mutant. *J Cell Sci*, 115(Pt 24), pp. 4891-900.
- Iglesias, V.A. & Meins, F., Jr. (2000). Movement of plant viruses is delayed in a beta-1,3-glucanase-deficient mutant showing a reduced plasmodesmatal size exclusion limit and enhanced callose deposition. *Plant J*, 21(2), pp. 157-66.
- Iriti, M. & Faoro, F. (2008). Abscisic acid is involved in chitosan-induced resistance to tobacco necrosis virus (TNV). *Plant Physiology and Biochemistry*, 46(12), pp. 1106-1111.
- Kalladan, R., Lasky, J.R., Chang, T.Z., Sharma, S., Juenger, T.E. & Verslues, P.E. (2017). Natural variation identifies genes affecting drought-induced abscisic acid accumulation in *Arabidopsis thaliana*. *Proceedings of the National Academy of Sciences*, 114(43), pp. 11536-11541.
- Kim, D., Pertea, G., Trapnell, C., Pimentel, H., Kelley, R. & Salzberg, S.L. (2013). TopHat2: accurate alignment of transcriptomes in the presence of insertions, deletions and gene fusions. *Genome Biology*, 14(4), p. R36.
- Kover, P.X. & Schaal, B.A. (2002). Genetic variation for disease resistance and tolerance among *Arabidopsis thaliana* accessions. *Proc Natl Acad Sci U S A*, 99(17), pp. 11270-4.
- Lefebvre, V., North, H., Frey, A., Sotta, B., Seo, M., Okamoto, M., Nambara, E. & Marion-Poll, A. (2006). Functional analysis of *Arabidopsis* NCED6 and NCED9 genes indicates that ABA synthesized in the endosperm is involved in the induction of seed dormancy. *The Plant Journal*, 45(3), pp. 309-319.
- Leisner, S.M. & Howell, S.H. (1992). Symptom variation in different *Arabidopsis thaliana* ecotypes produced by cauliflower mosaic virus. *Phytopathology*, 82(10), pp. 1042-1046.
- Li, H., Handsaker, B., Wysoker, A., Fennell, T., Ruan, J., Homer, N., Marth, G., Abecasis, G., Durbin, R. & Subgroup, G.P.D.P. (2009). The Sequence Alignment/Map format and SAMtools. *Bioinformatics*, 25(16), pp. 2078-2079.

- Li, S., Lyu, S., Liu, Y., Luo, M., Shi, S. & Deng, S. (2021). Cauliflower mosaic virus P6 Dysfunctions Histone Deacetylase HD2C to Promote Virus Infection. *Cells*, 10(9), p. 2278.
- Li, W., Zhao, Y., Liu, C., Yao, G., Wu, S., Hou, C., Zhang, M. & Wang, D. (2012). Callose deposition at plasmodesmata is a critical factor in restricting the cell-to-cell movement of Soybean mosaic virus. *Plant Cell Rep*, 31(5), pp. 905-16.
- Liao, Y., Smyth, G.K. & Shi, W. (2014). featureCounts: an efficient general purpose program for assigning sequence reads to genomic features. *Bioinformatics*, 30(7), pp. 923-30.
- Ling, R., Pate, A.E., Carr, J.P. & Firth, A.E. (2013). An essential fifth coding ORF in the sobemoviruses. *Virology*, 446(1-2), pp. 397-408.
- Liu, S., Chen, M., Li, R., Li, W.-X., Gal-On, A., Jia, Z. & Ding, S.-W. (2022). Identification of positive and negative regulators of antiviral RNA interference in *Arabidopsis thaliana*. *Nature Communications*, 13(1), p. 2994.
- Long, Q., Rabanal, F.A., Meng, D., Huber, C.D., Farlow, A., Platzer, A., Zhang, Q., Vilhjálmsson, B.J., Korte, A., Nizhynska, V., Voronin, V., Korte, P., Sedman, L., Mandáková, T., Lysak, M.A., Seren, Ü., Hellmann, I. & Nordborg, M. (2013). Massive genomic variation and strong selection in *Arabidopsis thaliana* lines from Sweden. *Nature Genetics*, 45(8), pp. 884-890.
- Love, A.J., Yun, B.W., Laval, V., Loake, G.J. & Milner, J.J. (2005). Cauliflower mosaic virus, a compatible pathogen of *Arabidopsis*, engages three distinct defense-signaling pathways and activates rapid systemic generation of reactive oxygen species. *Plant Physiol*, 139(2), pp. 935-48.
- Love, M.I., Huber, W. & Anders, S. (2014). Moderated estimation of fold change and dispersion for RNA-seq data with DESeq2. *Genome Biology*, 15(12), p. 550.
- Martin, M. (2011). Cutadapt removes adapter sequences from high-throughput sequencing reads. *2011*, 17(1), p. 3.
- Monnot, S., Desaint, H., Mary-Huard, T., Moreau, L., Schurdi-Levraud, V. & Boissot, N. (2021). Deciphering the Genetic Architecture of Plant Virus Resistance by GWAS, State of the Art and Potential Advances. *Cells*, 10(11), p. 3080.
- Montes, N., Alonso-Blanco, C. & Garcia-Arenal, F. (2019). Cucumber mosaic virus infection as a potential selective pressure on *Arabidopsis thaliana* populations. *PLoS pathogens*, 15(5), p. e1007810.
- Montes, N., Cobos, A., Gil-Valle, M., Caro, E. & Pagán, I. (2021). *Arabidopsis thaliana* Genes Associated with Cucumber mosaic virus Virulence and Their Link to Virus Seed Transmission. *Microorganisms*, 9(4), p. 692.
- Pagán, I., Alonso-Blanco, C. & García-Arenal, F. (2007). The Relationship of Within-Host Multiplication and Virulence in a Plant-Virus System. *PLoS One*, 2(8), p. e786.
- Pagán, I., Fraile, A., Fernandez-Fueyo, E., Montes, N., Alonso-Blanco, C. & García-Arenal, F. (2010). *Arabidopsis thaliana* as a model for the study of plant-virus co-evolution. *Philosophical transactions of the Royal Society of London. Series B, Biological sciences*, 365(1548), pp. 1983-1995.
- Pagán, I. & García-Arenal, F. (2020). Tolerance of Plants to Pathogens: A Unifying View. *Annu Rev Phytopathol*, 58, pp. 77-96.
- Pagny, G., Paulstephenraj, P.S., Poque, S., Sicard, O., Cosson, P., Eyquard, J.-P., Caballero, M., Chague, A., Gourdon, G., Negrel, L., Candresse, T., Mariette, S. & Decroocq, V. (2012).

- Family-based linkage and association mapping reveals novel genes affecting Plum pox virus infection in *Arabidopsis thaliana*. *New Phytologist*, 196(3), pp. 873-886.
- Pasin, F., Shan, H., García, B., Müller, M., San León, D., Ludman, M., Fresno, D.H., Fátýol, K., Munné-Bosch, S., Rodrigo, G. & García, J.A. (2020). Abscisic Acid Connects Phytohormone Signaling with RNA Metabolic Pathways and Promotes an Antiviral Response that Is Evaded by a Self-Controlled RNA Virus. *Plant communications*, 1(5), p. 100099.
- Paudel, D.B. & Sanfaçon, H. (2018). Exploring the diversity of mechanisms associated with plant tolerance to virus infection. *Frontiers in Plant Science*, 9, p. 1575.
- Prendeville, H.R., Ye, X., Jack Morris, T. & Pilson, D. (2012). Virus infections in wild plant populations are both frequent and often unapparent. *American Journal of Botany*, 99(6), pp. 1033-1042.
- Raybould, A., Maskell, L., Edwards, M.L., Cooper, J. & Gray, A. (1999). The prevalence and spatial distribution of viruses in natural populations of *Brassica oleracea*. *New Phytologist*, 141(2), pp. 265-275.
- Roossinck, M.J. (2013). Plant virus ecology. *PLoS Pathog*, 9(5), p. e1003304.
- Rubio, B., Cosson, P., Caballero, M., Revers, F., Bergelson, J., Roux, F. & Schurdi-Levraud, V. (2019). Genome-wide association study reveals new loci involved in *Arabidopsis thaliana* and Turnip mosaic virus (TuMV) interactions in the field. *New Phytol*, 221(4), pp. 2026-2038.
- Schepetilnikov, M., Kobayashi, K., Geldreich, A., Caranta, C., Robaglia, C., Keller, M. & Ryabova, L.A. (2011). Viral factor TAV recruits TOR/S6K1 signalling to activate reinitiation after long ORF translation. *The EMBO journal*, 30(7), pp. 1343-1356.
- Schoelz, J.E. & Leisner, S. (2017). Setting Up Shop: The Formation and Function of the Viral Factories of Cauliflower mosaic virus. *Front Plant Sci*, 8, p. 1832.
- Seren, Ü., Vilhjálmsson, B.J., Horton, M.W., Meng, D., Forai, P., Huang, Y.S., Long, Q., Segura, V. & Nordborg, M. (2012). GWAPP: a web application for genome-wide association mapping in *Arabidopsis*. *The Plant Cell*, 24(12), pp. 4793-4805.
- Shukla, A., Pagán, I. & García-Arenal, F. (2018). Effective tolerance based on resource reallocation is a virus-specific defence in *Arabidopsis thaliana*. *Mol Plant Pathol*, 19(6), pp. 1454-1465.
- Shukla, A., Ustun, S. & Hafrén, A. (2021). Proteasome homeostasis is essential for a robust cauliflower mosaic virus infection. *bioRxiv*.
- Soosaar, J.L., Burch-Smith, T.M. & Dinesh-Kumar, S.P. (2005). Mechanisms of plant resistance to viruses. *Nature Reviews Microbiology*, 3(10), pp. 789-798.
- Sridha, S. & Wu, K. (2006). Identification of AtHD2C as a novel regulator of abscisic acid responses in *Arabidopsis*. *Plant J*, 46(1), pp. 124-33.
- Takahashi, H., Miller, J., Nozaki, Y., Takeda, M., Shah, J., Hase, S., Ikegami, M., Ehara, Y. & Dinesh-Kumar, S.P. (2002). RCY1, an *Arabidopsis thaliana* RPP8/HRT family resistance gene, conferring resistance to cucumber mosaic virus requires salicylic acid, ethylene and a novel signal transduction mechanism. *Plant J*, 32(5), pp. 655-67.
- Tan, B.-C., Joseph, L.M., Deng, W.-T., Liu, L., Li, Q.-B., Cline, K. & McCarty, D.R. (2003a). Molecular characterization of the *Arabidopsis* 9-cis epoxy-carotenoid dioxygenase gene family. *The Plant Journal*, 35(1), pp. 44-56.

- Tan, B.C., Joseph, L.M., Deng, W.T., Liu, L., Li, Q.B., Cline, K. & McCarty, D.R. (2003b). Molecular characterization of the Arabidopsis 9-cis epoxy-carotenoid dioxygenase gene family. *Plant J*, 35(1), pp. 44-56.
- Ton, J., Flors, V. & Mauch-Mani, B. (2009). The multifaceted role of ABA in disease resistance. *Trends Plant Sci*, 14(6), pp. 310-7.
- Torres-Barceló, C., Daròs, J.-A. & Elena, S.F. (2010). HC-Pro hypo- and hypersuppressor mutants: differences in viral siRNA accumulation in vivo and siRNA binding activity in vitro. *Archives of virology*, 155(2), pp. 251-254.
- Verhoeven, A., Kloth, K.J., Kupczok, A., Oymans, G.H., Damen, J., Rijnsburger, K., Jiang, Z., Deelen, C., Sasidharan, R. & van Zanten, M. (2022). Arabidopsis latent virus 1, a comovirus widely spread in Arabidopsis thaliana collections. *New Phytologist*.
- Verma, V., Ravindran, P. & Kumar, P.P. (2016). Plant hormone-mediated regulation of stress responses. *BMC Plant Biology*, 16(1), p. 86.
- Whenham, R., Fraser, R., Brown, L. & Payne, J. (1986). Tobacco-mosaic-virus-induced increase in abscisic-acid concentration in tobacco leaves. *Planta*, 168(4), pp. 592-598.
- Wickham, H. (2016). Package 'ggplot2': elegant graphics for data analysis. *Springer-Verlag New York*. doi, 10, pp. 978-0.
- Wickham, H., Averick, M., Bryan, J., Chang, W., McGowan, L., François, R., Grolemund, G., Hayes, A., Henry, L. & Hester, J. Welcome to the tidyverse. *J. Open Source Softw.* 4 (43), 1686 (2019).
- Yasuda, M., Ishikawa, A., Jikumaru, Y., Seki, M., Umezawa, T., Asami, T., Maruyama-Nakashita, A., Kudo, T., Shinozaki, K., Yoshida, S. & Nakashita, H. (2008). Antagonistic interaction between systemic acquired resistance and the abscisic acid-mediated abiotic stress response in Arabidopsis. *Plant Cell*, 20(6), pp. 1678-92.
- Zavaliev, R., Levy, A., Gera, A. & Epel, B.L. (2013). Subcellular dynamics and role of Arabidopsis  $\beta$ -1,3-glucanases in cell-to-cell movement of tobamoviruses. *Mol Plant Microbe Interact*, 26(9), pp. 1016-30.
